# Supplementary material
Source: HighWire-hosted journal article supplement (https://jnm.snmjournals.org/highwire/filestream/111364/field_highwire_adjunct_files/0/265025_Supplemental_Data.pdf)
Supplement: 265025_Supplemental_Data.pdf [file 265025_Supplemental_Data.pdf]

| miTr Nx Mx cohort<br>(n=226)                                                                                                                                                                                                                                                        | COMPLETELY covered<br>by CTV (n=107)                                                                                             | NOT covered by CTV<br>(n=28)                                                                                                                                          | PARTIALLY covered by<br>CTV (n=91)                                                                                                                                  | p-value            |
|-------------------------------------------------------------------------------------------------------------------------------------------------------------------------------------------------------------------------------------------------------------------------------------|----------------------------------------------------------------------------------------------------------------------------------|-----------------------------------------------------------------------------------------------------------------------------------------------------------------------|---------------------------------------------------------------------------------------------------------------------------------------------------------------------|--------------------|
| Median Age*, yr (IQR)                                                                                                                                                                                                                                                               | 69 (63 - 73)                                                                                                                     | 69 (67 – 76.3)                                                                                                                                                        | 70 (63.25 - 75)                                                                                                                                                     | 0.38 <sup>a</sup>  |
| Serum PSA ng/ml*, Median (IQR)                                                                                                                                                                                                                                                      | 1.40 (0.6 – 2.4)                                                                                                                 | 0.92 (0.59 – 1.76)                                                                                                                                                    | 1.3 (0.57 – 4.25)                                                                                                                                                   | 0.27 <sup>a</sup>  |
| Tumor volume (ml), Median (IQR)                                                                                                                                                                                                                                                     | 0.7 (0.37 – 1.33)                                                                                                                | 0.7 (0.37 – 1.31)                                                                                                                                                     | 1.09 (0.51 – 2.83)                                                                                                                                                  | 0.03 <sup>a</sup>  |
| NCCN risk group, n (%)**<br><ul style="list-style-type: none"> <li>○ Low-risk</li> <li>○ Intermediate risk</li> <li>○ High risk</li> <li>○ Very high</li> <li>○ Not available</li> </ul>                                                                                            | <ul style="list-style-type: none"> <li>○ 8 (9)</li> <li>○ 35 (41)</li> <li>○ 23 (27)</li> <li>○ 19 (22)</li> <li>○ 21</li> </ul> | <ul style="list-style-type: none"> <li>○ 1 (4)</li> <li>○ 14 (54)</li> <li>○ 7 (27)</li> <li>○ 4 (15)</li> <li>○ 2</li> </ul>                                         | <ul style="list-style-type: none"> <li>○ 0</li> <li>○ 32 (43)</li> <li>○ 22 (30)</li> <li>○ 20 (27)</li> <li>○ 17</li> </ul>                                        | n/a                |
| Surgical margin involvement, n (%)**<br><ul style="list-style-type: none"> <li>○ No</li> <li>○ Yes</li> <li>○ Not available</li> </ul>                                                                                                                                              | <ul style="list-style-type: none"> <li>○ 42 (59)</li> <li>○ 29 (41)</li> <li>○ 36</li> </ul>                                     | <ul style="list-style-type: none"> <li>○ 19 (79)</li> <li>○ 5 (21)</li> <li>○ 4</li> </ul>                                                                            | <ul style="list-style-type: none"> <li>○ 38 (62)</li> <li>○ 23 (38)</li> <li>○ 31</li> </ul>                                                                        | 0.15 <sup>b</sup>  |
| Location of recurrence partially or completely<br>exceeding the CTV, n (%)<br><ul style="list-style-type: none"> <li>○ Posterior</li> <li>○ Postero-lateral</li> <li>○ Postero-inferior</li> <li>○ Anterior</li> <li>○ Superior</li> <li>○ Inferior</li> <li>○ Laterally</li> </ul> | n/a                                                                                                                              | <ul style="list-style-type: none"> <li>○ 10 (36)</li> <li>○ 7 (25)</li> <li>○ 4 (14)</li> <li>○ 0</li> <li>○ 0</li> <li>○ 0</li> <li>○ 7 (25)</li> <li>○ 0</li> </ul> | <ul style="list-style-type: none"> <li>○ 47 (52)</li> <li>○ 27 (30)</li> <li>○ 4 (4)</li> <li>○ 1 (1)</li> <li>○ 4 (4)</li> <li>○ 5 (5)</li> <li>○ 2 (2)</li> </ul> | n/a                |
| Local organs involvement, n (%)<br><ul style="list-style-type: none"> <li>○ Rectal wall involvement</li> <li>○ Bladder wall involvement</li> </ul>                                                                                                                                  | <ul style="list-style-type: none"> <li>○ 1 (1)</li> <li>○ 8 (8)</li> </ul>                                                       | <ul style="list-style-type: none"> <li>○ 9 (32)</li> <li>○ 0</li> </ul>                                                                                               | <ul style="list-style-type: none"> <li>○ 9 (10)</li> <li>○ 2 (2)</li> </ul>                                                                                         | 0.001 <sup>c</sup> |

**Supplementary Table 1.** Clinical characteristics and location of recurrences based on the three outcomes in the whole cohort (miTr Nx Mx). Age and PSA are at time of PET. The percentage was calculated on the total number of patients with the data available in the selected category. <sup>a</sup> One-way ANOVA; <sup>b</sup> Spearman  $\rho$  correlation matrix; <sup>c</sup> chi-square test.
